# Supplementary material for: Association between Meteorological Factors and Mumps and Models for Prediction in Chongqing, China
Source: MDPI journal article supplement (doi:10.3390/ijerph19116625), 2022-05-29
Supplement: s1 [file s1]

**Table S1.** Overall demographic characteristics of mumps cases from 2009-2019 in Chongqing.

| variables                  | Case number | Proportion (%) |
|----------------------------|-------------|----------------|
| Gender                     |             |                |
| male                       | 74089       | 58.29          |
| female                     | 53017       | 41.71          |
| total                      | 127107      | 100            |
| Age                        |             |                |
| 0~                         | 115358      | 90.76          |
| 18~                        | 6751        | 5.31           |
| 35~                        | 4092        | 3.22           |
| 60~                        | 906         | 0.71           |
| total                      | 127107      | 100            |
| Group                      |             |                |
| workers                    | 9986        | 7.86           |
| housework and unemployment | 482         | 0.38           |
| preschool children         | 40229       | 31.65          |
| students                   | 75943       | 59.75          |
| others                     | 467         | 0.37           |
| total                      | 127107      | 100            |
